# Supplementary material
Source: MDPI journal article supplement (https://www.mdpi.com/search?q=molbank-2019-M1059)
Supplement: s001 [file molbank-2019-M1059-s001.pdf]

## Supplementary:

# 5-[(Z)-5-Chloro-2-oxoindolin-3-ylidene]-3-[(E)-[(4-hydroxyphenyl)imino]methyl]-2-thioxothiazolidin-4-one

Abdelmounaim Safer <sup>1,2,\*</sup>, Khadidja Khaldoun <sup>1</sup> and Salima Saidi-Besbes <sup>1</sup>

<sup>1</sup> Laboratoire de synthèse organique appliquée, université oran1-Ahmed Benbella, Algeria. Bp 1524 el m'naouer 31000, Oran, Algeria; l3\_jijita\_ph@hotmail.com (K.K.); s.salima76@yahoo.com (S.S.-B.)

<sup>2</sup> Université des Sciences et de la Technologie d'Oran Mohamed-Boudiaf El Mnaouar, BP 1505, Bir El Djir 31000, Oran, Algeria

\* Correspondence: abdelmounaim.safer@univ-usto.dz; Tel.: +213-554-288-201.

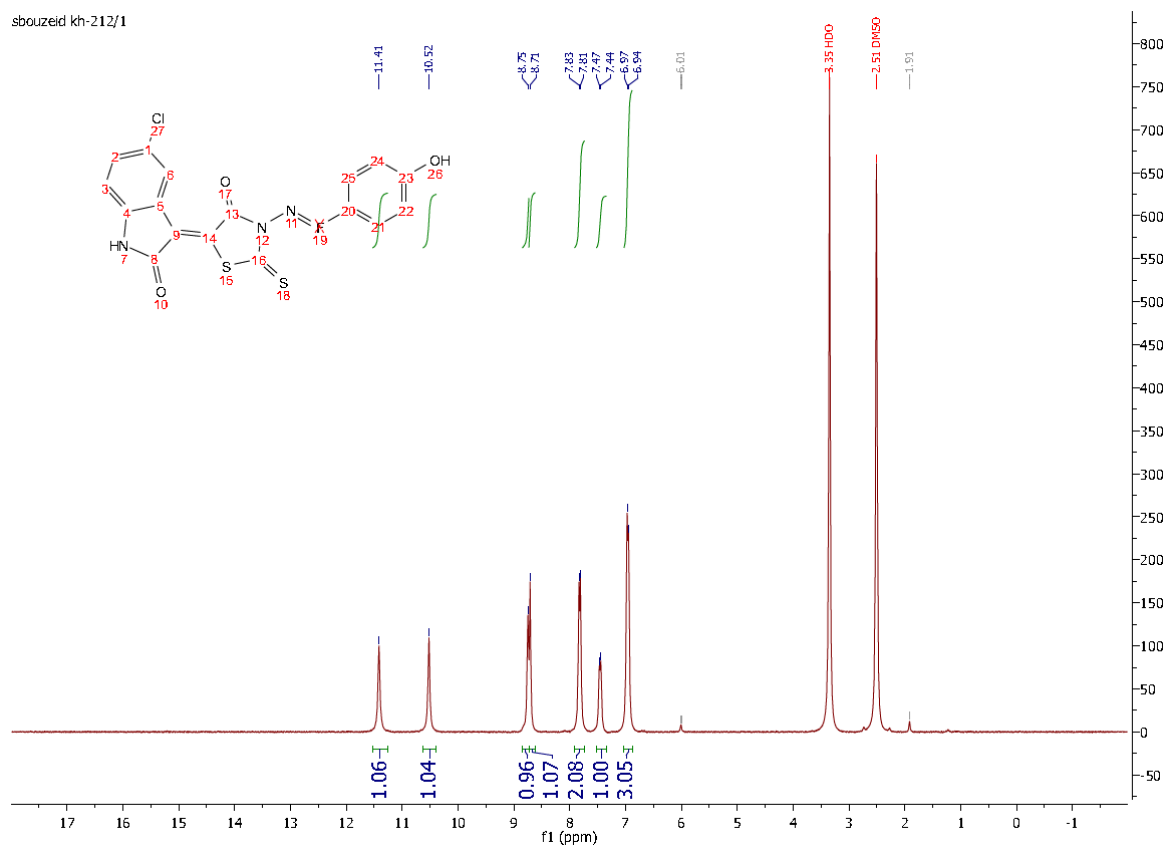

Figure S1. <sup>1</sup>H-NMR of compound 4.

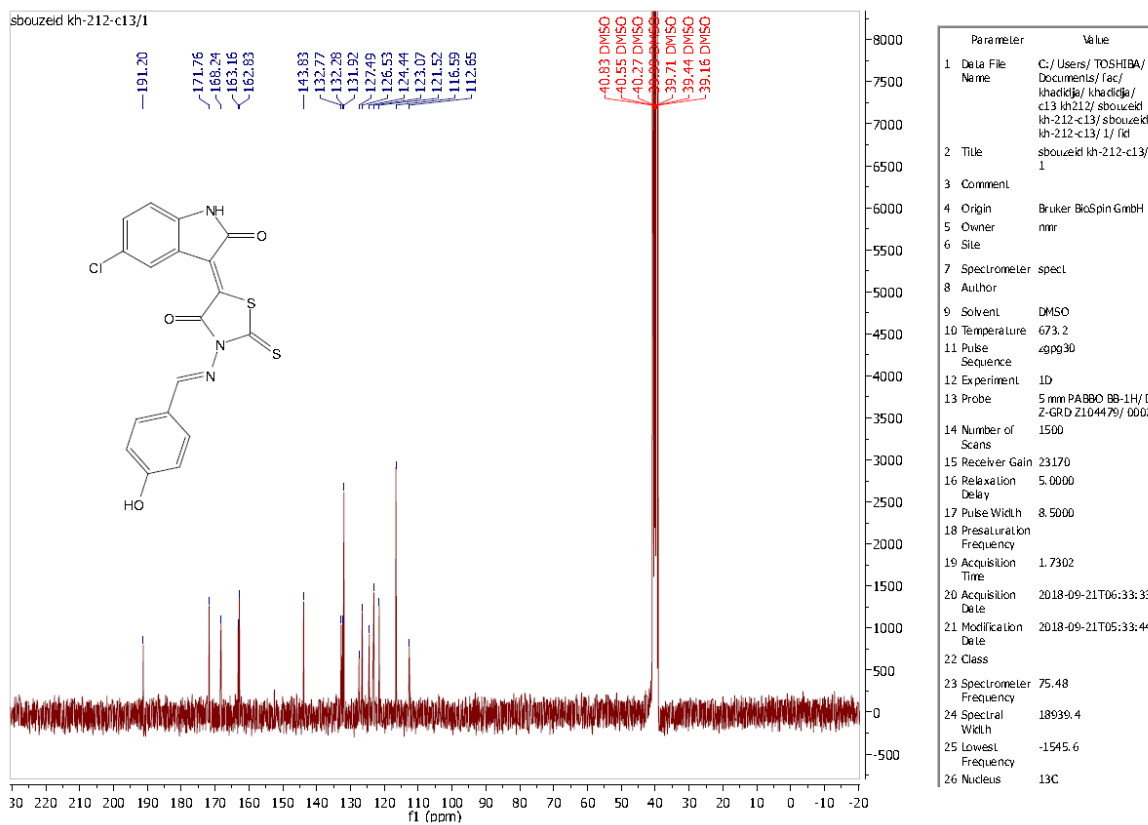

Figure S2. <sup>13</sup>C-NMR of compound 4.
